# Supplementary material
Source: MDPI journal article supplement (https://www.mdpi.com/2077-0472/11/6/534)
Supplement: s1 [file s1]

Table S1. Concentration of individual phenolic compounds ( $\mu\text{g g}^{-1}$  fresh weight) in tomato fruits under control, salinity, heat or the combination of salinity and heat. Values are means  $\pm$  SE ( $n = 6$ ).

|                                       | Control           | S                 | H                 | S + H             |
|---------------------------------------|-------------------|-------------------|-------------------|-------------------|
| Homovanillic acid- <i>O</i> -hexoside | 20.8 $\pm$ 6.7    | 21.1 $\pm$ 2.2    | 26.6 $\pm$ 3.5    | 37.3 $\pm$ 4.2    |
| Naringenin                            | 12.8 $\pm$ 1.5    | 12.7 $\pm$ 3.9    | 1.1 $\pm$ 0.3     | 1.4 $\pm$ 0.4     |
| Chlorogenic acid                      | 8.6 $\pm$ 2.6     | 6.0 $\pm$ 0.6     | 3.6 $\pm$ 0.4     | 5.4 $\pm$ 0.7     |
| Kaempferol-3- <i>O</i> -rutinoside    | 7.7 $\pm$ 2.4     | 11.2 $\pm$ 2.4    | 4.7 $\pm$ 0.7     | 10.8 $\pm$ 2.8    |
| Rutin                                 | 7.2 $\pm$ 2.0     | 10.7 $\pm$ 1.3    | 8.0 $\pm$ 4.0     | 16.5 $\pm$ 1.4    |
| Phloretin- <i>C</i> -diglycoside      | 4.0 $\pm$ 0.5     | 3.2 $\pm$ 0.1     | 3.8 $\pm$ 0.4     | 4.4 $\pm$ 0.8     |
| Naringenin- <i>O</i> -hexoside        | 3.4 $\pm$ 0.6     | 2.5 $\pm$ 0.1     | 3.0 $\pm$ 0.7     | 3.5 $\pm$ 0.3     |
| Caffeic acid- <i>O</i> -hexoside      | 1.8 $\pm$ 0.7     | 2.9 $\pm$ 0.1     | 1.5 $\pm$ 0.8     | 3.4 $\pm$ 0.5     |
| Cryptochlorogenic acid                | 1.5 $\pm$ 0.3     | 1.5 $\pm$ 0.1     | 1.0 $\pm$ 0.2     | 1.6 $\pm$ 0.3     |
| Ferulic acid- <i>O</i> -hexoside      | 1.5 $\pm$ 0.4     | 1.2 $\pm$ 0.3     | 0.9 $\pm$ 0.3     | 1.4 $\pm$ 0.3     |
| Dicaffeoylquinic                      | 0.18 $\pm$ 0.03   | 0.16 $\pm$ 0.01   | 0.09 $\pm$ 0.01   | 0.17 $\pm$ 0.01   |
| Ferulic acid                          | 0.16 $\pm$ 0.04   | 0.14 $\pm$ 0.02   | 0.12 $\pm$ 0.01   | 0.12 $\pm$ 0.01   |
| Caffeic acid                          | 0.13 $\pm$ 0.05   | 0.10 $\pm$ 0.02   | 0.13 $\pm$ 0.02   | 0.12 $\pm$ 0.00   |
| Coumaroylquinic acid                  | 0.13 $\pm$ 0.04   | 0.11 $\pm$ 0.02   | 0.13 $\pm$ 0.03   | 0.38 $\pm$ 0.16   |
| Rutin- <i>O</i> -hexoside             | 0.13 $\pm$ 0.06   | 0.15 $\pm$ 0.01   | 0.24 $\pm$ 0.10   | 0.26 $\pm$ 0.02   |
| Rutin- <i>O</i> -pentoside            | 0.054 $\pm$ 0.013 | 0.085 $\pm$ 0.013 | 0.039 $\pm$ 0.008 | 0.11 $\pm$ 0.014  |
| Quercetin                             | 0.047 $\pm$ 0.007 | 0.050 $\pm$ 0.004 | 0.032 $\pm$ 0.008 | 0.037 $\pm$ 0.010 |
| <i>p</i> -coumaric acid               | 0.034 $\pm$ 0.008 | 0.030 $\pm$ 0.006 | 0.034 $\pm$ 0.003 | 0.032 $\pm$ 0.002 |
